# Supplementary material
Source: PubMed Central journal article supplement (PMC3362325)
Supplement: Supp_Data.pdf [file Supp_Data.pdf]

## SUPPLEMENTARY DATA

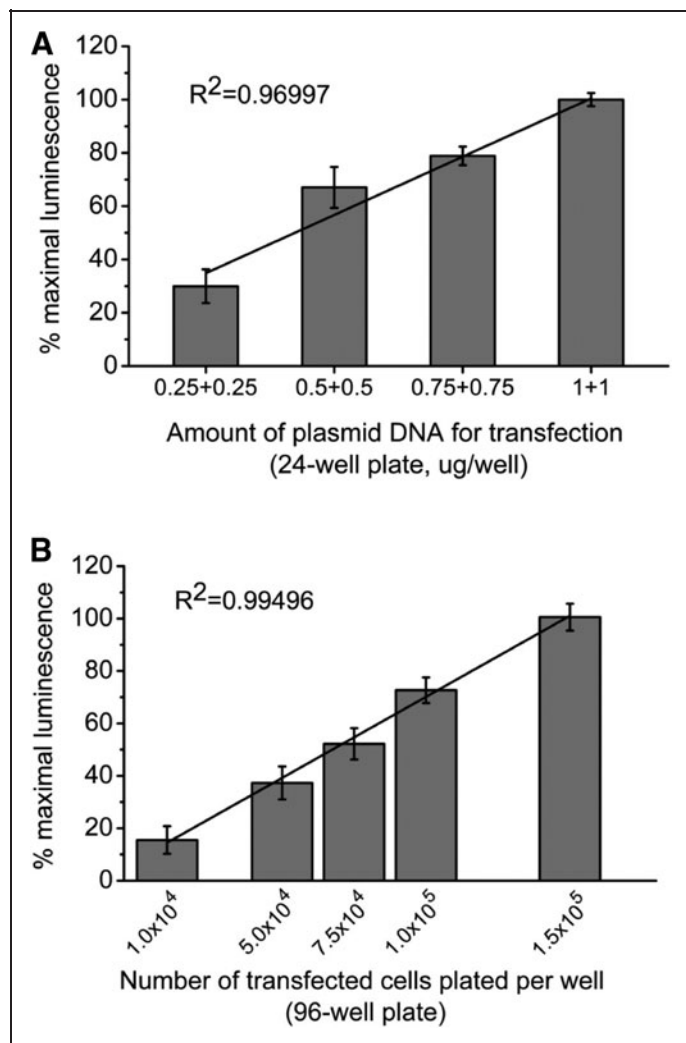

**Supplementary Fig. S1.** Assay optimization. **(A)** Luminescent signal intensity after co-transfection of HEK293 with different amounts of the expression vectors CLuc-FGF14 and CD4-Nav1.6Ctail-NLuc; (mean  $\pm$  SEM;  $n=12$ , from three independent experiments). **(B)** Luminescent signal intensity with different number of cells plated per well of a 96-well plate (mean  $\pm$  SEM;  $n=8$ , from two independent experiments). The level of luminescence is positively correlated with cDNA amounts and cell seeded.  $R^2$ =correlation coefficient was calculated using linear regression.
